# Supplementary material for: The Feasibility of a Novel School Peer-Led Mentoring Model to Improve the Physical Activity Levels and Sedentary Time of Adolescent Girls: The Girls Peer Activity (G-PACT) Project
Source: PubMed Central journal article supplement (PMC6028908; doi:10.3390/children5060067), 2018-05-31
Supplement: children-05-00067-s001.pdf [file children-05-00067-s001.pdf]

# Supplementary Material

## **Title: The Feasibility of a Novel School Peer-led Mentoring Model to Improve the Physical Activity Levels and Sedentary Time of Adolescent Girls: The Girls' Peer Activity (G-PACT) Project**

Michael B. Owen <sup>1\*</sup>, Charlotte Kerner <sup>1,2</sup>, Sarah L. Taylor <sup>1</sup>, Robert J. Noonan <sup>1</sup>, Lisa Newson <sup>3</sup>, Maria-Christina Kosteli <sup>1</sup>, Whitney B. Curry <sup>4</sup>, and Stuart J. Fairclough<sup>1,5</sup>

1. Physical Activity and Health Research Group, Department of Sport and Physical Activity, Edge Hill University, St Helens Road, Ormskirk, Lancashire, L39 4QP, UK; Michael.Owen@edgehill.ac.uk (M.B.O.); Sarah.Taylor11@go.edgehill.ac.uk (S.L.T.); Robert.Noonan@edgehill.ac.uk (R.J.N.); Maria-Christina.Kosteli@edgehill.ac.uk (M.C.K.); Stuart.Fairclough@edgehill.ac.uk (S.J.F.)
2. Department of Life Sciences, Brunel University, London, UB8 3PH, UK; Charlotte.Kerner@brunel.ac.uk (C.K.)
3. Natural Sciences and Psychology, Research Centre for Brain and Behaviour, Liverpool John Moores University, Liverpool, L3 5AF, UK; L.M.Newson@ljmu.ac.uk (L.N.)
4. Wellbeing and Public Health, Cornwall Council, Truro, TR1 3AY, UK; whitney.curry@cornwall.gov.uk (W.B.C.)
5. Department of Physical Education and Sport Sciences, University of Limerick, Limerick, Ireland

\* Correspondence: [Michael.Owen@edgehill.ac.uk](mailto:Michael.Owen@edgehill.ac.uk); Tel.: +44-016956-57344

**S1: Educational leadership sessions theory map and session aims**

| Session Focus                                                                | Session Overview / LO's                                                                                                                                                                                                                                                             | Behaviour Change Techniques                                                                                                                                                                                                                                                                                                      | SCT / SDT Constructs                                                                                                                                                                                         |
|------------------------------------------------------------------------------|-------------------------------------------------------------------------------------------------------------------------------------------------------------------------------------------------------------------------------------------------------------------------------------|----------------------------------------------------------------------------------------------------------------------------------------------------------------------------------------------------------------------------------------------------------------------------------------------------------------------------------|--------------------------------------------------------------------------------------------------------------------------------------------------------------------------------------------------------------|
| Workshop Day Part 1;<br>Introduction to programme and leadership Information | <ul style="list-style-type: none"> <li>- What is the purpose of the project?</li> <li>- Provide information about leadership and the role of peer leaders</li> <li>- What do the students think about leadership?</li> <li>- What are the traits of good leaders?</li> </ul>        | <ul style="list-style-type: none"> <li>- Participation in *fun* workshop activities</li> <li>- Prompt identification as role model/ position advocate</li> <li>- General communication skills training</li> </ul>                                                                                                                | <ul style="list-style-type: none"> <li>- Autonomy</li> <li>- Competence</li> <li>- Relatedness</li> <li>- Intrinsic Motivation</li> <li>- Role modelling</li> <li>- Self-efficacy</li> </ul>                 |
| Workshop Day Part 2;<br>PA and health knowledge                              | <ul style="list-style-type: none"> <li>- What is PA?</li> <li>- What are the different type of PA?</li> <li>- What physical activities do the students do?</li> <li>- Importance of PA for good health, physical, psychological and social</li> <li>- Communication task</li> </ul> | <ul style="list-style-type: none"> <li>- Provide information on consequences of behaviour in general</li> <li>- Provide information on consequences of behaviour to the individual</li> <li>- Provide normative information about others' behaviour</li> <li>- Prompt identification as role model/ position advocate</li> </ul> | <ul style="list-style-type: none"> <li>- Autonomy</li> <li>- Competence</li> <li>- Outcome expectations</li> <li>- Outcome expectations</li> <li>- Outcome expectations</li> <li>- Role modelling</li> </ul> |

|                                                                 |                                                                                                                                                                                                              |                                                                                                                                                                                                                            |                                                                                                                                                              |
|-----------------------------------------------------------------|--------------------------------------------------------------------------------------------------------------------------------------------------------------------------------------------------------------|----------------------------------------------------------------------------------------------------------------------------------------------------------------------------------------------------------------------------|--------------------------------------------------------------------------------------------------------------------------------------------------------------|
| School Workshop 1;<br>Motivation                                | <ul style="list-style-type: none"> <li>- What is motivation?</li> <li>- How to motivate others?</li> <li>- Review of first PA session</li> </ul>                                                             | <ul style="list-style-type: none"> <li>- Plan social support/ social change</li> <li>- Barrier identification/Problem solving</li> </ul>                                                                                   | <ul style="list-style-type: none"> <li>- Autonomy</li> <li>- Competence</li> <li>- Social support</li> </ul>                                                 |
| School Workshop 2;<br>Goal setting                              | <ul style="list-style-type: none"> <li>- What is goal setting?</li> <li>- How to set effective goals?</li> <li>- Develop goal setting skills / set targets to achieve</li> </ul>                             | <ul style="list-style-type: none"> <li>- Goal setting (behaviour)</li> <li>- Prompt self-monitoring of behaviour including; setting goals, reviewing goals, specifying action plans and feedback on performance</li> </ul> | <ul style="list-style-type: none"> <li>- Autonomy</li> <li>- Competence</li> <li>- Social support</li> <li>- Self-regulation</li> </ul>                      |
| School Workshop 3;<br>Barriers to PA and methods to increase PA | <ul style="list-style-type: none"> <li>- Identify barriers to PA</li> <li>- Methods to break down barriers</li> <li>- More in-depth benefits of physical activity</li> <li>- Problem solving task</li> </ul> | <ul style="list-style-type: none"> <li>- Barrier identification/Problem solving</li> <li>- Provide information on where and when to perform the behaviour (Prompts cues)</li> </ul>                                        | <ul style="list-style-type: none"> <li>- Self-efficacy</li> <li>- Autonomy</li> <li>- Competence</li> <li>- Intrinsic Motivation</li> </ul>                  |
| School Workshop 4;<br>Social support and review of programme    | <ul style="list-style-type: none"> <li>- How to provide social support to friends</li> <li>- How to encourage friends</li> <li>- How to engage with peers</li> </ul>                                         | <ul style="list-style-type: none"> <li>- Plan social support/ social change</li> <li>- Barrier identification/Problem solving</li> </ul>                                                                                   | <ul style="list-style-type: none"> <li>- Social support</li> <li>- Self-efficacy</li> <li>- Autonomy</li> <li>- Competence</li> <li>- Relatedness</li> </ul> |

|                                                                   |                                                                                                                                                                                                                                                                                                                              |                                                                                                                                                                                                                                                                                                                                   |                                                                                                                                                                                                                         |
|-------------------------------------------------------------------|------------------------------------------------------------------------------------------------------------------------------------------------------------------------------------------------------------------------------------------------------------------------------------------------------------------------------|-----------------------------------------------------------------------------------------------------------------------------------------------------------------------------------------------------------------------------------------------------------------------------------------------------------------------------------|-------------------------------------------------------------------------------------------------------------------------------------------------------------------------------------------------------------------------|
|                                                                   | <ul style="list-style-type: none"> <li>- Review previously covered content for information booklet</li> <li>- Problem solving task</li> </ul>                                                                                                                                                                                |                                                                                                                                                                                                                                                                                                                                   |                                                                                                                                                                                                                         |
| School Support Sessions 5 and 6; Leadership support and mentoring | <ul style="list-style-type: none"> <li>- Revisit previously set goals</li> <li>- Re-set goals for future weeks</li> <li>- Provide the leaders support and advice on their role</li> <li>- Discuss the new after school PA club and probe for feedback on the club</li> <li>- Encourage peer leaders in their role</li> </ul> | <ul style="list-style-type: none"> <li>- Review behaviour goals (goal setting)</li> <li>- Prompt self-monitoring of behaviour</li> <li>- Prompt review of behavioural goals</li> <li>- Barrier identification/Problem solving</li> <li>- Provide information on where and when to perform the behaviour (Prompts cues)</li> </ul> | <ul style="list-style-type: none"> <li>- Autonomy</li> <li>- Competence</li> <li>- Relatedness</li> <li>- Intrinsic Motivation</li> <li>- Social support</li> <li>- Self-regulation</li> <li>- Self-efficacy</li> </ul> |

**S2:** After-school club period adjusted means (SE) for ST and MVPA at baseline, post-INT and mean difference

| School               | Time     | ST (Minutes) |     | Adjusted<br>difference in<br>means<br>(95% CI) | MVPA<br>(Minutes) |     | Adjusted<br>difference<br>in means<br>(95% CI) |
|----------------------|----------|--------------|-----|------------------------------------------------|-------------------|-----|------------------------------------------------|
|                      |          | Mean         | SE  |                                                | Mean              | SE  |                                                |
| <b>1.Class</b>       | Baseline | 62.9         | 0.0 | -1.4<br>(-4.5 to -0.7)                         | 5.1               | 0.0 | 0.0<br>(-0.1 to 1.2)                           |
|                      | Post-INT | 61.5         | 1.1 |                                                | 5.1               | 0.4 |                                                |
| <b>2.Choice</b>      | Baseline | 62.9         | 0.0 | 2.7<br>(-0.3 to 5.8)                           | 5.1               | 0.0 | 0.0<br>(-1.2 to 1.2)                           |
|                      | Post-INT | 65.6         | 1.6 |                                                | 5.1               | 0.6 |                                                |
| <b>3.No<br/>Club</b> | Baseline | 62.9         | 0.0 | 1.1<br>(-2.3 to 4.2)                           | 5.1               | 0.0 | -1.2<br>(-2.6 to -0.1)                         |
|                      | Post-INT | 64.0         | 1.4 |                                                | 3.9               | 0.5 |                                                |

Notes: Mean Difference = change baseline to post-INT
